# Clinicopathological Correlation and Prognostic Significance of Protein Kinase C $\alpha$ Overexpression in Human Gastric Carcinoma

Shee-Chan Lin<sup>1,9</sup>, Wei-Yu Chen<sup>2,3,9</sup>, Kai-Yuan Lin<sup>4,5</sup>, Sheng-Hsuan Chen<sup>6,7</sup>, Chun-Chao Chang<sup>6,7</sup>, Sey-En Lin<sup>2,8</sup>, Chia-Lang Fang<sup>2,3\*</sup>

**1** Division of Gastroenterology, Department of Internal Medicine, Mackay Memorial Hospital, Taipei, Taiwan, **2** Department of Pathology, School of Medicine, College of Medicine, Taipei Medical University, Taipei, Taiwan, **3** Department of Pathology, Wan Fang Hospital, Taipei Medical University, Taipei, Taiwan, **4** Department of Medical Research, Chi-Mei Medical Center, Tainan, Taiwan, **5** Department of Biotechnology, Chia Nan University of Pharmacy and Science, Tainan, Taiwan, **6** Department of Internal Medicine, School of Medicine, College of Medicine, Taipei Medical University, Taipei, Taiwan, **7** Division of Gastroenterology, Department of Internal Medicine, Taipei Medical University Hospital, Taipei, Taiwan, **8** Department of Pathology, Taipei Medical University Hospital, Taipei, Taiwan

## Abstract

**Objectives:** This study investigated the PKC $\alpha$  protein expression in gastric carcinoma, and correlated it with clinicopathological parameters. The prognostic significance of PKC $\alpha$  protein expression in gastric carcinoma was analyzed.

**Methods:** Quantitative real-time PCR test was applied to compare the PKC $\alpha$  mRNA expression in tumorous and nontumorous tissues of gastric carcinoma in ten randomly selected cases. Then PKC $\alpha$  protein expression was evaluated in 215 cases of gastric carcinoma using immunohistochemical method. The immunoreactivity was scored semiquantitatively as: 0 = absent; 1 = weak; 2 = moderate; and 3 = strong. All cases were further classified into two groups, namely PKC $\alpha$  overexpression group with score 2 or 3, and non-overexpression group with score 0 or 1. The PKC $\alpha$  protein expression was correlated with clinicopathological parameters. Survival analysis was performed to determine the prognostic significance of PKC $\alpha$  protein expression in patients with gastric carcinoma.

**Results:** PKC $\alpha$  mRNA expression was upregulated in all ten cases of gastric carcinoma via quantitative real-time PCR test. In immunohistochemical study, eighty-eight out of 215 cases (41%) of gastric carcinoma revealed PKC $\alpha$  protein overexpression, which was statistically correlated with age ( $P=0.0073$ ), histologic type ( $P<0.0001$ ), tumor differentiation ( $P=0.0110$ ), depth of invasion ( $P=0.0003$ ), angiolymphatic invasion ( $P=0.0373$ ), pathologic stage ( $P=0.0047$ ), and distant metastasis ( $P=0.0048$ ). We found no significant difference in overall and disease free survival rates between PKC $\alpha$  overexpression and non-overexpression groups ( $P=0.0680$  and  $0.0587$ ). However, PKC $\alpha$  protein overexpression emerged as a significant independent prognostic factor in multivariate Cox regression analysis (hazard ratio 0.632,  $P=0.0415$ ).

**Conclusions:** PKC $\alpha$  protein is upregulated in gastric carcinoma. PKC $\alpha$  protein expression is statistically correlated with age, histologic type, tumor differentiation, depth of invasion, angiolymphatic invasion, pathologic stage, and distant metastasis. The PKC $\alpha$  protein overexpression in patients with gastric carcinoma is a significant independent prognostic factor in multivariate Cox regression analysis.

**Citation:** Lin S-C, Chen W-Y, Lin K-Y, Chen S-H, Chang C-C, et al. (2013) Clinicopathological Correlation and Prognostic Significance of Protein Kinase C $\alpha$  Overexpression in Human Gastric Carcinoma. PLoS ONE 8(2): e56675. doi:10.1371/journal.pone.0056675

**Editor:** Masaru Katoh, National Cancer Center, Japan

**Received:** June 18, 2012; **Accepted:** January 16, 2013; **Published:** February 26, 2013

**Copyright:** © 2013 Lin et al. This is an open-access article distributed under the terms of the Creative Commons Attribution License, which permits unrestricted use, distribution, and reproduction in any medium, provided the original author and source are credited.

**Funding:** This work was supported by the grant (94MMH-TMU-16) from Mackay Memorial Hospital (www.mmh.org.tw). The funders had no role in study design, data collection and analysis, decision to publish, or preparation of the manuscript.

**Competing Interests:** The authors have declared that no competing interests exist.

\* E-mail: ccllfang@tmu.edu.tw

9 These authors contributed equally to this work.

## Introduction

Gastric cancer is the fourth most common cancer worldwide, and the second leading cause of cancer death in men and the fourth in women [1,2]. Although surgical techniques and adjuvant chemotherapy have substantially improved recently and rate of early detection by endoscopy has increased, the overall 5-year survival rate remains dismal [1]. A steady decline in gastric cancer incidence has been observed in most developed countries and some developing countries over the past 50 years [2]. However,

gastric cancer remains a major public health problem throughout the world. The carcinogenesis of gastric carcinoma is not well understood, but it exhibits a multi-hit process of genetic alterations involving suppressor genes and oncogenes [3,4].

The protein kinase C (PKC) family consists of serine-threonine kinases that act by phosphorylating their specific protein substrates. The PKC family members are classified into three major groups: classical ( $\alpha$ ,  $\beta$ , and  $\gamma$ ), novel ( $\delta$ ,  $\epsilon$ ,  $\eta$ , and  $\theta$ ), and atypical ( $\mu$ ,  $\lambda$ ,  $\xi$ ). Activation of classical PKCs depends on calcium

and phospholipids. Novel PKCs are activated by phospholipids, and activation of atypical forms occurs independently of calcium or phospholipids. PKCs are involved in various cellular processes including regulating gene expression, proliferation, differentiation, apoptosis, migration, and tumor development [5–10]. Because of the existence of many PKC isoforms and their involvement in different cellular signaling pathways, the roles of PKC isoforms in carcinogenesis have not been clarified [8].

Among the PKC isoforms, PKC $\alpha$  is ubiquitously expressed in many tissues and has been associated with cell proliferation, apoptosis, and cell motility. PKC $\alpha$  activation results in increased cell motility and invasiveness in *in vivo* and *in vitro* cancer models [8]. PKC $\alpha$  has been found to be the most important PKC isoform in the formation and progression of malignancies in various cell lines [11]. Abnormal levels of PKC $\alpha$  have been found in transformed cell lines and human cancers [12]. Substantial evidence from gene knockout studies indicates that PKC $\alpha$  activity regulates cancer growth and progression. Selective targeting of PKC $\alpha$  thus has a potential therapeutic role in a wide variety of human cancers [13].

The specific role of PKC $\alpha$  in gastrointestinal tumors has not been well studied [14]. Among the PKC family, PKC $\alpha$  is the most abundant isoform in gastric epithelia, and might play an important role in the carcinogenesis and metastasis of gastric cancers [10]. Furthermore, PKC $\alpha$  is known to play a critical role in cancer cell proliferation and in maintaining the transformed phenotype and tumorigenic capacity of gastric cancer cells [10,14]. Our previous study using quantitative real-time PCR tests demonstrated that in gastric carcinoma, PKC $\alpha$  mRNA overexpression was correlated with distant metastasis, and might be an independent prognostic marker [15]. However, the expression of PKC $\alpha$  protein in gastric carcinoma and its clinicopathological correlations have not been investigated. Our study thus evaluated the expression of PKC $\alpha$  protein in gastric carcinoma using immunohistochemical method. The aims of this study were to assess the expression of PKC $\alpha$  protein in gastric carcinoma, and to correlate it with other clinicopathological parameters. The prognostic significance of PKC $\alpha$  protein overexpression in gastric carcinoma was also investigated.

## Materials and Methods

We collected 215 consecutive cases of gastric carcinoma from the medical files of both Wan-Fang Hospital and Taipei Medical University Hospital in Taiwan. All patients included in our study group were treated between 1997 and 2011, and had received surgical resection with radical total or subtotal gastrectomy and lymph node dissection. All pathological reports and hematoxylin & eosin sections were available and reviewed to determine pathological parameters including tumor size, location, histologic type, differentiation, depth of invasion, angiolymphatic invasion, nodal status, local recurrence status, distant metastasis, and pathologic staging. The pathologic staging was based on the 7th edition of the TNM staging system of AJCC. For each case, one or more representative sections and corresponding blocks of both tumorous and non-tumorous tissues were retrieved for immunohistochemical study. From the patients' records, we obtained the information including postoperative courses, tumor recurrence, distant metastasis, and outcome. This study received ethical approval from the institutional review board of Taipei Medical University. Written informed consent was obtained from each participant before tissue acquisition.

## Quantitative Real-Time PCR Test

At first quantitative real-time PCR test was applied to test and compare the mRNA expression of PKC $\alpha$  in tumorous and nontumorous tissues of gastric carcinoma in a small scale. Ten tumor and non-tumor pairs of gastric tissues were randomly selected from the Tumor and Serum Bank of Chi-Mei Medical Center (Tainan, Taiwan). All samples were collected from the specimens via radical gastrectomy. The non-tumor part was taken from the grossly normal gastric mucosa away from the tumor. All tissues were frozen in liquid nitrogen within 20 min and kept at  $-80^{\circ}\text{C}$  until use.

The procedure of quantitative real-time PCR test was performed according to previous study [15].

## Immunohistochemical Study

Sections of 5  $\mu\text{m}$  thickness were taken from formalin-fixed paraffin-embedded blocks. The procedure of immunohistochemical study was performed according to previous study [15]. Deparaffinized sections were incubated in pH 6.0 citrate buffer for 40 min at  $95^{\circ}\text{C}$  on a hotplate to retrieve the antigens. Endogenous peroxidase was blocked by 3% hydrogen peroxide for 5 min. The sections were subsequently incubated with antibody against PKC $\alpha$  (Santa Cruz Biotechnology Inc., Santa Cruz, CA, SC-8393) for 30 min at room temperature at a dilution of 1:100 using DAKO primary antibody diluent. To detect immunoreactivity, the avidin-biotin-complex method was applied according to the manufacturer's instructions. A sensitive Dako EnVision kit (Dako North America Inc., Carpinteria, CA) was used as the detection system. After incubation with secondary antibody (DAKO EnVision) for 30 min at room temperature, followed by diaminobenzidine for 8 min, sections were counterstained with Mayer's hematoxylin. Normal human distal renal tubules were used as a positive control. The negative control was made by omitting the primary antibody and incubation with PBS.

The PKC $\alpha$  immunoreactivity was evaluated independently by two pathologists (CL Fang and SE Lin). As in previous studies [16,17], the results were scored semiquantitatively in four categories: 0 = absent, 1 = weak, 2 = moderate, and 3 = strong immunoreactivity. The positive staining of nerve bundles in the same slide was used as the positive internal control and was allocated score 2. The negative control provided a reference of score 0. Score 1 was defined as positive staining that was weak compared with internal control; score 3 was allocated to positive staining stronger than that of internal control. Finally each case was assigned to one of two groups: either PKC $\alpha$  overexpression with score 2 or 3, or non-overexpression with score 0 or 1.

## Statistical Analysis

All data were analyzed using the SAS software (Version 9.2 SAS Institute Inc., Cary, NC). Chi-square tests and correlation coefficient analysis were performed to determine whether the correlations between PKC $\alpha$  overexpression and other clinicopathological parameters were statistically significant. The cumulative overall survival rates and disease free survival rates were calculated by the Kaplan-Meier method, and the differences in survival rates between PKC $\alpha$  overexpression and non-expression groups were analyzed by a log-rank test. To determine the relative prognostic impact of PKC $\alpha$  overexpression compared with other established prognostic markers, overall survival was analyzed using the Cox proportional hazard model. For uni and multivariate Cox regression analysis, continuous variables were coded as binary variables. Backward multivariate analysis was also applied to identify independent prognostic markers. All tests were performed with the significance level at  $P < 0.05$ .

**Results**

**PKC $\alpha$  mRNA Expression was Upregulated in Gastric Carcinoma**

In all ten tumor and non-tumor pairs of gastric tissues randomly selected for quantitative real-time PCR, the mRNA expression of PKC $\alpha$  in tumor tissues were substantially increased when compared to non-tumor tissues (Table 1).

**Basic Data for Immunohistochemical Study**

Data from a total of 215 cases of gastric carcinoma were analyzed. The patients included 134 men and 81 women, with a mean age of 69 years (range 30 years to 96 years). Among the 215 cases, 52 patients had the disease at stage I, 43 patients at stage II, 98 patients at stage III, and 22 patients at stage IV. Postoperative clinical follow-up and survival analysis were recorded in all 215 patients. The follow-up period ranged from 5 days to 5131 days (mean 1143 days). Distant metastasis status was obtained in all patients, of whom 67 had metastatic diseases.

**PKC $\alpha$  Protein Expression was Upregulated in Gastric Carcinoma**

Of the total 215 cases of gastric carcinoma, 88 patients (41%) revealed PKC $\alpha$  protein overexpression. The intensity and distribution of immunoreactivity varied among the PKC $\alpha$ -positive cases, and immunoreactivity was observed in the cytoplasm of the tumor cells. In all cases, the normal gastric glands in non-tumor tissues revealed negative staining (Fig. 1a). Overexpression of PKC $\alpha$  protein was observed in tumor cells but not in normal gastric glands, with the difference being statistically significant (McNemar test,  $P < 0.001$ ).

**Overexpression of PKC $\alpha$  Protein Was Statistically Correlated with Age, Histologic Type, Tumor Differentiation, Depth of Invasion, Angiolymphatic Invasion, Pathologic Stage, and Distant Metastasis**

A Chi-square test was performed to determine the significance of the difference between PKC $\alpha$  overexpression and other clinicopathological parameters (Table 2). PKC $\alpha$  protein overexpression was statistically correlated with age. Patients aged 60

years or older had a higher rate of PKC $\alpha$  protein overexpression (46%) than those of less than 60 years (25%). There was a statistically significant correlation between PKC $\alpha$  protein overexpression and histologic type ( $P < 0.0001$ ). Among 137 cases of intestinal type carcinoma, 71 cases (52%) showed PKC $\alpha$  protein overexpression. In contrast, only 17 out of 78 cases (22%) of diffuse type carcinoma showed PKC $\alpha$  protein overexpression. In addition, overexpression of PKC $\alpha$  protein was significantly statistically correlated with tumor differentiation ( $P = 0.0110$ ). Among the 112 cases of well to moderately-differentiated carcinoma, 55 (49%) displayed PKC $\alpha$  protein overexpression. However, among the 103 cases of poorly-differentiated carcinoma, only 33 (32%) exhibited PKC $\alpha$  protein overexpression. Our data thus revealed that well to moderately-differentiated intestinal type tumors more frequently expressed PKC $\alpha$  protein than those of the diffuse type. The PKC $\alpha$  immunostaining patterns of various histologic type and tumor differentiation are shown in Figs. 1b to 1i. A statistical significance was also noticed between PKC $\alpha$  protein overexpression and depth of tumor invasion. In 66 cases of T1 and T2 tumor (invasion not beyond muscularis propria), 39 (59%) presented PKC $\alpha$  protein overexpression. In contrast, 49 out of 149 cases (33%) of T3 and T4 tumor (invasion of subserosa or deeper) displayed PKC $\alpha$  protein overexpression. Also found is a statistical significance between PKC $\alpha$  protein overexpression and angiolymphatic invasion. There were 135 cases with angiolymphatic invasion and 80 cases with no invasion. The PKC $\alpha$  protein overexpression rates were 36% in the former and 50% in the latter, respectively. The tumors with vascular emboli had lower PKC $\alpha$  protein overexpression rate than those with no emboli. Overexpression of PKC $\alpha$  protein has a statistical correlation with pathologic stage. Among the 95 stage I and II cases, there were 49 (52%) with PKC $\alpha$  protein overexpression. In 120 cases at stage III and IV, only 39 (33%) revealed PKC $\alpha$  protein overexpression. We observed that early stage tumors were likely to express PKC $\alpha$  protein than tumors with advanced stage. Finally, there was a significantly statistical correlation between PKC $\alpha$  protein overexpression and distant metastasis. Eighteen out of 67 cases (27%) with distant metastasis showed overexpression of PKC $\alpha$  protein, and 70 out of 148 cases (47%) with no distant metastasis possessed PKC $\alpha$  protein overexpression. Therefore, PKC $\alpha$  protein overexpression was negatively statistically correlated with distant metastasis. In addition, correlation coefficients were calculated. The correlation coefficient ( $r$ ) and  $P$  value ( $P$ ) in statistically significant variables were as follows: age ( $r = 0.16301$ ;  $P = 0.0167$ ), histologic type ( $r = -0.29364$ ;  $P < 0.0001$ ), tumor differentiation ( $r = -0.17341$ ;  $P = 0.0109$ ), depth of invasion ( $r = -0.24581$ ;  $P = 0.0003$ ), angiolymphatic invasion ( $r = -0.14199$ ;  $P = 0.0375$ ), pathologic stage ( $r = -0.19269$ ;  $P = 0.0046$ ), and distant metastasis ( $r = -0.19245$ ;  $P = 0.0046$ ).

No statistical significance was found between PKC $\alpha$  protein overexpression and other clinicopathological parameters including gender, tumor size, location, lymph node status, and local recurrence.

**The Expression of PKC $\alpha$  Protein Was a Significant Independent Prognostic Factor in Multivariate Cox Regression Analysis**

The data of 215 patients were enrolled for survival analysis. The overall survival rate among the 88 patients with PKC $\alpha$  protein overexpression was 64%, and among the 127 without overexpression was 47%. We also analyzed disease free survival. In PKC $\alpha$  protein overexpression group and non-overexpression group, the disease free survival rates were 58% and 42%, respectively. The difference in overall and disease free survival rates between the

**Table 1.** Quantification of PKC $\alpha$  mRNA Expression by Quantitative Real-Time PCR in 10 Tumor and Non-tumor Pairs of Gastric Tissues.

|    | Non-tumor        |       |                        | Tumor        |       |                    |
|----|------------------|-------|------------------------|--------------|-------|--------------------|
|    | No. PKC $\alpha$ | GAPDH | $\Delta C_{non-tumor}$ | PKC $\alpha$ | GAPDH | $\Delta C_{tumor}$ |
| 1  | 35.10            | 25.14 | 9.96                   | 32.09        | 23.41 | 8.68               |
| 2  | 34.90            | 28.17 | 6.73                   | 28.87        | 23.89 | 4.98               |
| 3  | 34.84            | 30.15 | 4.69                   | 33.32        | 30.00 | 3.32               |
| 4  | 40.00            | 29.58 | 10.42                  | 34.53        | 28.05 | 6.48               |
| 5  | 34.91            | 31.22 | 3.69                   | 33.21        | 31.18 | 2.03               |
| 6  | 40.00            | 23.54 | 16.46                  | 40.00        | 24.83 | 15.17              |
| 7  | 34.44            | 32.29 | 2.15                   | 29.11        | 28.61 | 0.50               |
| 8  | 40.00            | 31.02 | 8.98                   | 33.71        | 26.64 | 7.07               |
| 9  | 35.40            | 28.47 | 6.93                   | 33.01        | 27.63 | 5.38               |
| 10 | 35.73            | 27.25 | 8.48                   | 33.32        | 26.83 | 6.49               |

doi:10.1371/journal.pone.0056675.t001

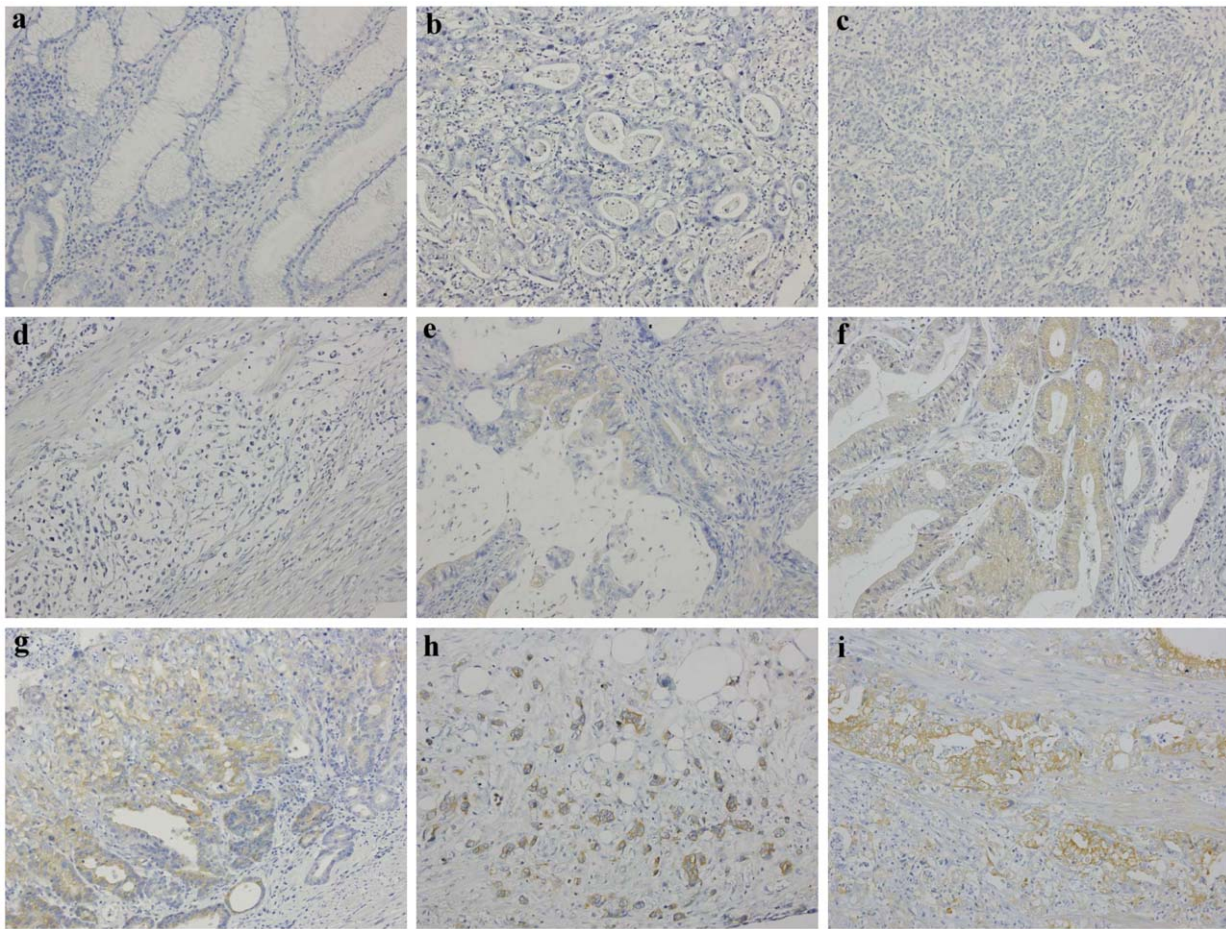

**Figure 1. PKC $\alpha$  immunoreactivity in gastric carcinoma of various histologic type and differentiation.** **a** normal gastric glands showing negative immunostaining, **b** negative immunostaining in a moderately-differentiated adenocarcinoma of intestinal type, **c** negative immunostaining in a poorly-differentiated adenocarcinoma of intestinal type, **d** negative immunostaining of signet-ring cells in a diffuse type adenocarcinoma, **e** weakly positive immunostaining in a moderately-differentiated adenocarcinoma of intestinal type, **f** moderately positive immunostaining in a well-differentiated adenocarcinoma of intestinal type, **g** moderately positive immunostaining in a moderately to poorly-differentiated adenocarcinoma of intestinal type, **h** moderately positive immunostaining in a diffuse type adenocarcinoma, and **i** strongly positive immunostaining in a moderately-differentiated adenocarcinoma of intestinal type. Magnification: X200. doi:10.1371/journal.pone.0056675.g001

PKC $\alpha$  overexpression and non-overexpression groups was not statistically significant (log rank test  $P=0.0680$  and  $0.0587$ ), but did indicate a tendency for patients with PKC $\alpha$  protein overexpression to have a longer overall survival and disease free survival than those lacking overexpression.

The univariate Cox regression analysis of prognostic markers is summarized in Table 3. The overall survival was statistically correlated with age, tumor size, histologic type, tumor differentiation, depth of invasion, angiolymphatic invasion, nodal status, pathologic staging, local recurrence, and distant metastasis. PKC $\alpha$  protein overexpression was not statistically correlated with overall survival in univariate analysis ( $P=0.0699$ ). However, backward multivariate Cox regression analysis found that PKC $\alpha$  protein overexpression was an independent prognostic marker for overall survival. Patients in the overexpression group had a statistically significant longer overall survival rate compared with patients in the non-expression group (hazard ratio 0.632; 95% confidence interval 0.407–0.982;  $P=0.0415$ ) (Table 4). Other co-variables of prognosis included age, pathologic stage, local recurrence, and distant metastasis.

## Discussion

The protein kinase C (PKC) family consists of serine-threonine kinases that act by phosphorylating specific protein substrates. PKCs are involved in regulating gene expression, proliferation, apoptosis, and migration [5]. Different PKC isoforms display cell specific patterns of distribution that reflect a variety of role of isoforms [18]. PKC $\alpha$  is the most important PKC isoform for the formation and progression of malignancies in various cell lines [11], and abnormal PKC $\alpha$  levels are found in many transformed cell lines [14]. PKC $\alpha$  acts as a tumor promoter in some tumors, but it functions as a tumor suppressor in others [13]. PKC $\alpha$  expression and its role in tumorigenesis and tumor progression have been documented in human cancers. PKC $\alpha$  overexpression has been reported in prostate carcinoma, endometrial carcinoma, high-grade bladder urothelial carcinoma, and hepatocellular carcinoma. The up- or downregulation of PKC $\alpha$  has been described in hematological malignancies [8], and PKC $\alpha$  downregulation has been observed in basal cell carcinoma and colon carcinoma [8,19–21]. One study reported the activation of PKC $\alpha$  in breast cancer [22], whereas other studies have demonstrated the downregulation of PKC $\alpha$  protein in breast cancer [8,13,17].

**Table 2.** PKC $\alpha$  Protein Expression in Gastric Carcinoma and its Correlation with Clinicopathological Parameters.

| Parameters                     | PKC $\alpha$ overexpression |                           | P*      |
|--------------------------------|-----------------------------|---------------------------|---------|
|                                | Negative<br>(case number)   | Positive<br>(case number) |         |
| <b>Age (years)</b>             |                             |                           |         |
| <60                            | 39                          | 13                        |         |
| ≥60                            | 88                          | 75                        | 0.0073  |
| <b>Gender</b>                  |                             |                           |         |
| Female                         | 46                          | 35                        |         |
| Male                           | 81                          | 53                        | 0.5971  |
| <b>Tumor size (cm)</b>         |                             |                           |         |
| ≤5                             | 55                          | 48                        |         |
| >5                             | 72                          | 40                        | 0.1048  |
| <b>Tumor location</b>          |                             |                           |         |
| Proximal                       | 20                          | 17                        |         |
| Distal                         | 107                         | 71                        | 0.4953  |
| <b>Histologic type</b>         |                             |                           |         |
| Intestinal type                | 66                          | 71                        |         |
| Diffuse type                   | 61                          | 17                        | <0.0001 |
| <b>Differentiation</b>         |                             |                           |         |
| Well to moderately             | 57                          | 55                        |         |
| Poorly                         | 70                          | 33                        | 0.0110  |
| <b>Depth of invasion</b>       |                             |                           |         |
| T1–T2                          | 27                          | 39                        |         |
| T3–T4                          | 100                         | 49                        | 0.0003  |
| <b>Angiolymphatic invasion</b> |                             |                           |         |
| Absent                         | 40                          | 40                        |         |
| Present                        | 87                          | 48                        | 0.0373  |
| <b>Nodal status</b>            |                             |                           |         |
| N0                             | 38                          | 33                        |         |
| N1-3                           | 89                          | 55                        | 0.2453  |
| <b>TNM stage</b>               |                             |                           |         |
| I-II                           | 46                          | 49                        |         |
| III-IV                         | 81                          | 39                        | 0.0047  |
| <b>Distant metastasis</b>      |                             |                           |         |
| Absent                         | 78                          | 70                        |         |
| Present                        | 49                          | 18                        | 0.0048  |
| <b>Local recurrence</b>        |                             |                           |         |
| No                             | 113                         | 79                        |         |
| Yes                            | 14                          | 9                         | 0.8526  |

\*Significance level:  $P < 0.05$ .  
doi:10.1371/journal.pone.0056675.t002

**Table 3.** Uni-Variate Analysis of Prognostic Markers in 215 Patients with Gastric Carcinoma.

| Variables                                    | Hazard ratio | 95% CI*      | P**     |
|----------------------------------------------|--------------|--------------|---------|
| <b>Age (years)</b>                           |              |              |         |
| <60                                          | 1            |              |         |
| ≥60                                          | 1.914        | 1.158–3.164  | 0.0114  |
| <b>Gender</b>                                |              |              |         |
| Female                                       | 1            |              |         |
| Male                                         | 1.267        | 0.837–1.920  | 0.2632  |
| <b>Tumor size (cm)</b>                       |              |              |         |
| ≤5                                           | 1            |              |         |
| >5                                           | 3.396        | 2.163–5.333  | <0.0001 |
| <b>Tumor location</b>                        |              |              |         |
| Proximal                                     | 1            |              |         |
| Distal                                       | 0.682        | 0.417–1.114  | 0.1264  |
| <b>Histologic type</b>                       |              |              |         |
| Intestinal type                              | 1            |              |         |
| Diffuse type                                 | 1.525        | 1.023–2.274  | 0.0381  |
| <b>Differentiation</b>                       |              |              |         |
| Well to moderately                           | 1            |              |         |
| Poorly                                       | 1.761        | 1.183–2.620  | 0.0053  |
| <b>Depth of invasion</b>                     |              |              |         |
| T1–T2                                        | 1            |              |         |
| T3–T4                                        | 6.497        | 3.262–12.940 | <0.0001 |
| <b>Angiolymphatic invasion</b>               |              |              |         |
| Absent                                       | 1            |              |         |
| Present                                      | 3.813        | 2.297–6.328  | <0.0001 |
| <b>Nodal status</b>                          |              |              |         |
| N0                                           | 1            |              |         |
| N1-3                                         | 6.281        | 3.343–11.800 | <0.0001 |
| <b>Pathologic stage</b>                      |              |              |         |
| I-II                                         | 1            |              |         |
| III-IV                                       | 6.147        | 3.627–10.420 | <0.0001 |
| <b>Distant metastasis</b>                    |              |              |         |
| Absent                                       | 1            |              |         |
| Present                                      | 5.224        | 3.435–7.944  | <0.0001 |
| <b>Local recurrence</b>                      |              |              |         |
| No                                           | 1            |              |         |
| Yes                                          | 3.494        | 2.117–5.766  | <0.0001 |
| <b>PKC<math>\alpha</math> overexpression</b> |              |              |         |
| Negative                                     | 1            |              |         |
| Positive                                     | 0.677        | 0.444–1.032  | 0.0699  |

\*CI: confidence interval;  
\*\*Significance level:  $P < 0.05$ .  
doi:10.1371/journal.pone.0056675.t003

PKC $\alpha$  inhibits cell growth in normal intestinal epithelial cells and pancreatic carcinoma [19]. Thus the expression patterns of PKC isoforms differ across different tissues and even within the same tissue [23]. To date, the role of PKC $\alpha$  expression in human cancers is not well understood, but seems to depend on tumor type.

PKC $\alpha$  has been hypothesized to play an important role in the carcinogenesis and metastasis of gastrointestinal cancers. PKC $\alpha$

protein is the most abundant isoform in gastric epithelial cells [10], although the role of PKC $\alpha$  in gastrointestinal tumors is not clear. With regard to intestinal cancer, one study has postulated that PKC $\alpha$  acts as a tumor suppressor [9], but another study has indicated that PKC $\alpha$  may act as both a tumor promoter and tumor suppressor [24]. In colon carcinoma, PKC $\alpha$  overexpression has been correlated with the migratory activity of tumor cells [23]. The first report to document the critical role of PKC $\alpha$  in

**Table 4.** Backward Multi-Variate Analysis of PKC $\alpha$  Protein Expression and Other Prognostic Markers in 215 Patients with Gastric Carcinoma.

| Variables                                    | Hazard ratio | 95% CI*     | p**     |
|----------------------------------------------|--------------|-------------|---------|
| <b>PKC<math>\alpha</math> overexpression</b> |              |             |         |
| Negative                                     | 1            |             |         |
| Positive                                     | 0.632        | 0.407–0.982 | 0.0415  |
| <b>Age</b>                                   |              |             |         |
| <60                                          | 1            |             |         |
| $\geq$ 60                                    | 2.953        | 1.749–4.986 | <0.0001 |
| <b>Pathologic stage</b>                      |              |             |         |
| I+II                                         | 1            |             |         |
| III+IV                                       | 2.310        | 1.052–5.073 | 0.0370  |
| <b>Nodal status</b>                          |              |             |         |
| N0                                           | 1            |             |         |
| N1-3                                         | 2.115        | 0.861–5.196 | 0.1025  |
| <b>Distant metastasis</b>                    |              |             |         |
| Absent                                       | 1            |             |         |
| Present                                      | 3.573        | 2.285–5.586 | <0.0001 |
| <b>Local recurrence</b>                      |              |             |         |
| No                                           | 1            |             |         |
| Yes                                          | 3.174        | 1.856–5.428 | <0.0001 |

\*CI: confidence interval;

\*\*Significance level:  $P < 0.05$ .

doi:10.1371/journal.pone.0056675.t004

maintaining the transformed phenotype of gastric cancer cells was published in 2004 [10]. Another study showed that PKC $\alpha$  promotes apoptosis of MGC80-3 gastric cancer cells [25]. Recently, we postulated that PKC $\alpha$  mRNA expression is upregulated, and is associated with distant metastasis in gastric carcinoma [15].

Several immunohistochemical studies have demonstrated that PKC $\alpha$  is overexpressed in high-grade bladder, prostate, and endometrial cancers, whereas breast, colon, and basal cell cancers display downregulation of PKC $\alpha$  expression [21]. Although an association between PKC $\alpha$  expression and gastric carcinoma has been documented, neither the clinicopathological correlations nor the prognostic significance of PKC $\alpha$  protein overexpression in gastric carcinoma had been studied. In this study, we tested the PKC $\alpha$  mRNA expression in gastric carcinoma at first via quantitative real-time PCR using ten pairs of tumor and non-tumor gastric tissues. Our data demonstrated PKC $\alpha$  mRNA expression was upregulated in gastric carcinoma. Then we applied immunohistochemical method to evaluate the expression of PKC $\alpha$  protein in gastric carcinomas. Our data indicated PKC $\alpha$  protein overexpression in 41% cases of gastric carcinoma. Furthermore, PKC $\alpha$  protein overexpression was correlated to clinicopathological parameters. We found PKC $\alpha$  protein overexpression to be statistically correlated with histological type. Intestinal type tumors more frequently expressed PKC $\alpha$  protein than did diffuse type tumors. According to general concept of gastric carcinogenesis, intestinal type and diffuse type carcinomas appear to evolve through different pathways, involving different oncogenes and tumor suppressor genes [26]. Gene expression profiling studies have shown that diffuse type carcinoma exhibits an altered expression of genes related to cell-matrix interaction and extracellular-matrix components, whereas intestinal type carcinoma

exhibits enhanced cell growth [27]. Thus we conduct that PKC $\alpha$  protein plays a role in gastric carcinogenesis, especially intestinal type carcinoma.

We also found PKC $\alpha$  protein overexpression to be statistically correlated with tumor differentiation. Well to moderately-differentiated tumors more frequently expressed PKC $\alpha$  protein than did poorly-differentiated ones. The association between PKC $\alpha$  activity and tumor differentiation and/or histological grading has been reported for various malignancies. In superficial bladder cancer, abnormally activated PKC $\alpha$  may play a role in tumor differentiation, and elevated PKC $\alpha$  activation correlates with higher histological grade [28]. PKC $\alpha$  is highly expressed in poorly-differentiated hepatocellular carcinoma cell lines [11]. In melanomas, PKC $\alpha$  activation is typically associated with decreased differentiation [12]. PKC $\alpha$  expression is elevated in high-grade endometrial tumors [19]. In breast cancer, expression of PKC $\alpha$  correlates with high histological grade and proliferation rate [17]. By contrast, one study reported that ovarian carcinoma exhibited decreasing in PKC $\alpha$  expression with increasing histological grade [29]. We found PKC $\alpha$  protein overexpression to be associated with histological grade and tumor differentiation in gastric carcinoma. In addition, we found that PKC $\alpha$ -positive high-grade dysplastic glands, precursor lesions of intestinal type carcinoma, were frequently observed in intestinal type carcinomas with PKC $\alpha$  protein overexpression. The PKC $\alpha$  protein is thus thought to be involved in the early stage of gastric carcinogenesis.

PKC $\alpha$  has been thought to play an important role in tumor progression. It has been implicated in several cancer-related processes, such as invasion and metastasis [10]. The role of PKC $\alpha$  in regulating tumor growth and development is clearly complex and highly tissue-dependent. In some cases PKC $\alpha$  acts as a tumor promoter, and in others it functions as a tumor suppressor [13]. In current immunohistochemical study, expression of PKC $\alpha$  protein was negatively statistically correlated to depth of invasion, angiolymphatic invasion, pathologic stage, and distant metastasis. We thus conduct that PKC $\alpha$  protein acts as a tumor suppressor, and downregulates gastric carcinoma progression.

PKC $\alpha$  has been reported to be a prognostic marker in human cancers. In Kong's study, high level PKC $\alpha$  predicted a shortened recurrence-free survival in patients with superficial bladder carcinomas [28]. Haughian et al demonstrated that PKC $\alpha$  level may be a prognostic indicator of aggressive endometrial cancers [19]. Patients with higher PKC $\alpha$  mRNA expression in hepatocellular carcinomas have a significantly decreased survival rate [21]. For patients with breast cancer, the prognostic significance of PKC $\alpha$  is controversial. Lønne et al reported that patients with PKC $\alpha$ -positive breast carcinoma had a poorer survival rate [17], but Kerfoot et al found that PKC $\alpha$  was downregulated in advanced breast carcinoma [16]. Although no statistical significance via Kaplan-Meier method, our study showed a tendency for patients with PKC $\alpha$  protein overexpression to have a longer overall survival and disease free survival than those without overexpression. Furthermore, we found that PKC $\alpha$  protein overexpression was a significant independent prognostic factor for gastric carcinoma in multivariate analysis. Patients with PKC $\alpha$  protein overexpression had a statistically significant longer survival period.

In our previous study, we demonstrated that PKC $\alpha$  mRNA expression was upregulated and associated with distant metastasis in gastric carcinoma, and that PKC $\alpha$  mRNA overexpression predicted poor outcome [15]. Considering the results of that study together with those of the current one, we concluded that in patients with advanced gastric carcinomas, PKC $\alpha$  mRNA plays a promoting role in decreased survival, whereas PKC $\alpha$  protein has

an opposing effect to suppress cancer progression and decrease cancer mortality. Several hypotheses might account for this finding. First, PKC $\alpha$  protein is subjected to complete proteolysis during or preceding late-stage gastric cancers. A previous study has documented that the activation and degradation of PKC isoforms were controlled spatially and temporally [30]. Second, post-transcriptional processing and RNA splicing might be responsible for the opposite effects of mRNA versus the protein of PKC $\alpha$ . In addition, the catalytically-competent PKC $\alpha$  molecules in cells are tightly regulated by phosphorylation, cofactor binding, and intracellular localization. PKC $\alpha$  biological activity is modulated by and functionally interacts with a number of proto-oncogenes. The PKC $\alpha$  molecules must be processed by a series of phosphorylation to attain catalytic competence. Undergoing translocation to the plasma membrane, PKC $\alpha$  is activated and consequently carries out substrate phosphorylation. After this, phosphorylated PKC $\alpha$  resides in the cytoplasm of the cell and requires additional regulatory mechanisms to become fully catalytically active [7,16]. Therefore, PKC $\alpha$  protein expression might not fully represent kinase activity. In addition, immunoreactivity might not fully reflect true protein expression [31]. Further studies using kinase activity assay, immunogold labeling to identify

subcellular localization and translocation of PKC $\alpha$  protein, and fluorescence in situ hybridization to detect PKC $\alpha$  mRNA in different pathological stages of gastric carcinoma are needed to clarify the discrepant roles of protein and mRNA of PKC $\alpha$ .

In conclusion, we demonstrated that PKC $\alpha$  protein is upregulated in gastric carcinoma. PKC $\alpha$  protein expression was statistically correlated with age, histologic type, tumor differentiation, depth of invasion, angiolymphatic invasion, pathologic stage, and distant metastasis. The PKC $\alpha$  protein overexpression was a significant independent prognostic factor for patients with gastric carcinoma in multivariate Cox regression analysis.

## Acknowledgments

The authors would like to thank Shu Mei Yang for her excellent statistical assistance.

## Author Contributions

Conceived and designed the experiments: CLF. Performed the experiments: SCL WYC KYL. Analyzed the data: SCL WYC SEL CLF. Contributed reagents/materials/analysis tools: KYL SHC CCC. Wrote the paper: CLF.

## References

- Kamangar F, Dores GM, Anderson WF. (2006) Patterns of Cancer Incidence, Mortality, and Prevalence across Five Continents: Defining Priorities to Reduce Cancer Disparities in Different Geographic Regions of the World. *J Clin Oncol* 24: 2137–2150.
- Garcia MJA, Ward EM. (2007) Global Cancer Facts and Figures. American Cancer Society. 18 p.
- Kuniyasu H, Domen T, Hamamoto T, Yokozaki H, Yasui W, et al. (1997) Expression of Human Telomerase RNA Is an Early Event of Stomach Carcinogenesis. *Jpn J Cancer Res* 88: 103–107.
- Lan J, Xiong YY, Lin YX, Wang BC, Gong LL, et al. (2003) Helicobacter Pylori Infection Generated Gastric Cancer Through p53-Rb Tumor-Suppressor System Mutation and Telomerase Reactivation. *World J Gastroenterol* 9: 54–58.
- Koivunen J, Aaltonen V, Koskela S, Lehenkari P, Laato M, et al. (2004) Protein Kinase C Alpha/Beta Inhibitor Go6976 Promotes Formation of Cell Junctions and Inhibits Invasion of Urinary Bladder Carcinoma Cells. *Cancer Res* 64: 5693–5701.
- Lin X, Yu Y, Zhao H, Zhang Y, Manela J, et al. (2006) Overexpression of PKC $\alpha$  Is Required to Impart Estradiol Inhibition and Tamoxifen-Resistance in a T47D Human Breast Cancer Tumor Model. *Carcinogenesis* 27: 1538–1546.
- Michie AM, Nakagawa R. (2005) The Link between PKC $\alpha$  Regulation and Cellular Transformation. *Immunol Lett* 96: 155–162.
- Martiny-Baron G, Fabbro D. (2007) Classical PKC Isoforms in Cancer. *Pharmacol Res* 55: 477–486.
- Oster H, Leitges M. (2006) Protein Kinase C $\alpha$  but not PKC $\xi$  Suppresses Intestinal Tumor Formation in ApcMin/+ Mice. *Cancer Res* 66: 6955–6963.
- Jiang XH, Tu SP, Cui JT, Lin MCM, XiaHHX, et al. (2004) Antisense Targeting Protein Kinase C  $\alpha$  and  $\beta$  Inhibits Gastric Carcinogenesis. *Cancer Res* 64: 5787–5794.
- Wu TT, Hsieh YH, Hsieh YS, Liu JY. (2008) Reduction of PKC $\alpha$  Decreases Cell Proliferation, Migration, and Invasion of Human Malignant Hepatocellular Carcinoma. *J Cell Biochem* 103: 9–20.
- Lahn MM, Sundell KL. (2004) The Role of Protein Kinase C-alpha (PKC- $\alpha$ ) in Melanoma. *Melanoma Res* 14: 85–89.
- Konopatskaya O, Poole AW. (2010) Protein Kinase C $\alpha$ : Disease Regulator and Therapeutic Target. *Trends Pharmacol Sci* 31: 8–14.
- Lahn M, Paterson BM, Sundell K, Ma D. (2004) The Role of Protein Kinase C-alpha (PKC- $\alpha$ ) in Malignancies of the Gastrointestinal Tract. *Eur J Cancer* 40: 10–20.
- Lin KY, Fang CL, Uen YH, Chang CC, Lou HY, et al. (2008) Overexpression of Protein Kinase C $\alpha$  mRNA May be an Independent Prognostic Marker for Gastric Carcinoma. *J Surg Oncol* 97: 538–543.
- Kerfoot C, Huang W, Rotenberg SA. (2004) Immunohistochemical Analysis of Advanced Human Breast Carcinomas Reveals Downregulation of Protein Kinase C $\alpha$ . *J Histochem Cytochem* 52: 419–422.
- Lønne GK, Cornmark L, Zahirovic IO, Landberg G, Jirstrom K, et al. (2010) PKC $\alpha$  Expression Is a Marker for Breast Cancer Aggressiveness. *Mol Cancer* 9: 76.
- Fumess JB, Hind AJ, Ngui K, Robbins HL, Clerc N, et al. (2006) The Distribution of PKC Isoforms in Enteric Neurons, Muscle and Interstitial Cells of the Human Intestine. *Histochem Cell Biol* 126: 537–548.
- Haughian JM, Bradford AP. (2009) Protein Kinase C Alpha (PKC $\alpha$ ) Regulates Growth and Invasion of Endometrial Cancer Cells. *J Cell Physiol* 220: 112–118.
- Cameron AJ, Procyk KJ, Leitges M, Parker PJ. (2008) PKC Alpha Protein but not Kinase Activity Is Critical for Glioma Cell Proliferation and Survival. *Int J Cancer* 123: 769–779.
- Wu TT, Hsieh YH, Wu CC, Hsieh YS, Huang CY, et al. (2007) Overexpression of Protein Kinase C $\alpha$  mRNA in Human Hepatocellular Carcinoma: a Potential Marker of Disease Prognosis. *Clin Chim Acta* 382: 54–58.
- Ng T, Squire A, Hansra G, Bornancin F, Prevostel C, et al. (1999) Imaging Protein Kinase C Alpha Activation in Cells. *Science* 283: 2085–2089.
- Masur K, Lang K, Niggemann B, Zanker KS, Frank E. (2001) High PKC  $\alpha$  and Low E-cadherin Expression Contribute to High Migratory Activity of Colon Carcinoma Cells. *Mol Biol Cell* 12: 1973–1982.
- Dempsey EC, Newton AC, Mochly-Rosen D, Fields AP, Reylund M, et al. (2000) Protein Kinase C Isozymes and the Regulation of Diverse Cell Responses. *Am J Physiol Lung Cell Mol Physiol* 279: 429–438.
- Zhang B, Wu Q, Ye XF, Liu S, Lin XF, et al. (2003) Roles of PLC- $\gamma$ 2 and PKC $\alpha$  in TPA-Induced Apoptosis of Gastric Cancer Cells. *World J Gastroenterol* 9: 2413–2418.
- Pfeifer JD. (2006) Molecular Genetic Testing in Surgical Pathology. Philadelphia: Lippincott Williams & Wilkins.
- Jinawath N, Furukawa Y, Hasegawa S, Li M, Tsunoda T, et al. (2004) Comparison of Gene-Expression Profiles between Diffuse- and Intestinal-Type Gastric Cancers Using a Genome-Wide cDNA Microarray. *Oncogene* 23: 6830–6844.
- Kong C, Zhu Y, Liu D, Yu M, Li S, et al. (2005) Role of Protein Kinase C-Alpha in Superficial Bladder Carcinoma Recurrence. *Urology* 65: 1228–1232.
- Weichert W, Gekeler V, Denkert C, Dietel M, Hauptmann S. (2003) Protein Kinase C Isoform Expression in Ovarian Carcinoma Correlates with Indicators of Poor Prognosis. *Int J Oncol* 23: 633–639.
- Teicher BA. (2006) Protein Kinase C as a Therapeutic Target. *Clin Cancer Res* 12: 5336–5345.
- Ainsworth PD, Winstanley JHR, Pearson JM, Bishop HM, Garrod DR. (2004) Protein Kinase C Alpha Expression in Normal Breast, Ductal Carcinoma in Situ and Invasive Ductal Carcinoma. *Eur J Cancer* 40: 2269–2273.
